# Supplementary material for: Examining Variability in Intra-Hospital Patient Referrals to Specialized Palliative Care: A Comprehensive Analysis of Disciplines and Mortality
Source: MDPI journal article supplement (doi:10.3390/jcm13092653), 2024-04-30
Supplement: s1 [file s1]

## Supplementary Material

**Table S1** The STROBE statement – Checklist of items that should be addressed in reports of observational studies

|                           | Item No | Recommendation                                                                                                                                                                                      | Page         |
|---------------------------|---------|-----------------------------------------------------------------------------------------------------------------------------------------------------------------------------------------------------|--------------|
| <b>Title and abstract</b> | 1       | (a) Indicate the study's design with a commonly used term in the title or the abstract                                                                                                              | 2            |
|                           |         | (b) Provide in the abstract an informative and balanced summary of what was done and what was found                                                                                                 | 2-3          |
| <b>Introduction</b>       |         |                                                                                                                                                                                                     |              |
| Background/rationale      | 2       | Explain the scientific background and rationale for the investigation being reported                                                                                                                | 4-5          |
| Objectives                | 3       | State specific objectives, including any pre-specified hypotheses                                                                                                                                   | 5            |
| <b>Methods</b>            |         |                                                                                                                                                                                                     |              |
| Study design              | 4       | Present key elements of study design early in the paper                                                                                                                                             | 6            |
| Setting                   | 5       | Describe the setting, locations, and relevant dates, including periods of recruitment, exposure, follow-up, and data collection                                                                     | 6            |
| Participants              | 6       | (a) Give the eligibility criteria, and the sources and methods of selection of participants. Describe methods of follow-up                                                                          | 6-7          |
|                           |         | (b) For matched studies, give matching criteria and number of exposed and unexposed                                                                                                                 | X            |
| Variables                 | 7       | Clearly define all outcomes, exposures, predictors, potential confounders, and effect modifiers. Give diagnostic criteria, if applicable                                                            | 7-8          |
| Data sources/measurement  | 8*      | For each variable of interest, give sources of data and details of methods of assessment (measurement). Describe comparability of assessment methods if there is more than one group                | 7-8          |
| Bias                      | 9       | Describe any efforts to address potential sources of bias                                                                                                                                           | 7            |
| Study size                | 10      | Explain how the study size was arrived at                                                                                                                                                           | 10           |
| Quantitative variables    | 11      | Explain how quantitative variables were handled in the analyses. If applicable, describe which groupings were chosen and why                                                                        | 8            |
| Statistical methods       | 12      | (a) Describe all statistical methods, including those used to control for confounding                                                                                                               | 8-9          |
|                           |         | (b) Describe any methods used to examine subgroups and interactions                                                                                                                                 | 8-9          |
|                           |         | (c) Explain how missing data were addressed                                                                                                                                                         | 7            |
|                           |         | (d) If applicable, explain how loss to follow-up was addressed                                                                                                                                      | n.a.         |
|                           |         | (e) Describe any sensitivity analyses                                                                                                                                                               | 9            |
| <b>Results</b>            |         |                                                                                                                                                                                                     |              |
| Participants              | 13*     | (a) Report numbers of individuals at each stage of study—e.g. numbers potentially eligible, examined for eligibility, confirmed eligible, included in the study, completing follow-up, and analysed | 10           |
|                           |         | (b) Give reasons for non-participation at each stage                                                                                                                                                | 10           |
|                           |         | (c) Consider use of a flow diagram                                                                                                                                                                  | 33           |
| Descriptive data          | 14*     | (a) Give characteristics of study participants (eg demographic, clinical, social) and information on exposures and potential confounders                                                            | 10-11; 13-16 |
|                           |         | (b) Indicate number of participants with missing data for each variable of interest                                                                                                                 | X            |
|                           |         | (c) Summarise follow-up time (eg, average and total amount)                                                                                                                                         | X            |
| Outcome data              | 15*     | Report numbers of outcome events or summary measures over time                                                                                                                                      | 11-16        |
| Main results              | 16      | (a) Give unadjusted estimates and, if applicable, confounder-adjusted estimates and their precision (eg, 95% confidence interval). Make clear which confounders                                     | 17-20        |

|                          |    |                                                                                                                                                                            |              |
|--------------------------|----|----------------------------------------------------------------------------------------------------------------------------------------------------------------------------|--------------|
|                          |    | were adjusted for and why they were included                                                                                                                               |              |
|                          |    | (b) Report category boundaries when continuous variables were categorized                                                                                                  | X            |
|                          |    | (c) If relevant, consider translating estimates of relative risk into absolute risk for a meaningful time period                                                           | X            |
| Other analyses           | 17 | Report other analyses done—e.g. analyses of subgroups and interactions, and sensitivity analyses                                                                           | 11-16; 34-35 |
| <b>Discussion</b>        |    |                                                                                                                                                                            |              |
| Key results              | 18 | Summarise key results with reference to study objectives                                                                                                                   | 21, 24       |
| Limitations              | 19 | Discuss limitations of the study, taking into account sources of potential bias or imprecision. Discuss both direction and magnitude of any potential bias                 | 23           |
| Interpretation           | 20 | Give a cautious overall interpretation of results considering objectives, limitations, multiplicity of analyses, results from similar studies, and other relevant evidence | 21-24        |
| Generalisability         | 21 | Discuss the generalisability (external validity) of the study results                                                                                                      | 23           |
| <b>Other information</b> |    |                                                                                                                                                                            |              |
| Funding                  | 22 | Give the source of funding and the role of the funders for the present study and, if applicable, for the original study on which the present article is based              | 26           |

\*Give information separately for exposed and unexposed groups.
